# Supplementary material for: Molecular assembly of amino acid interlinked, topologically symmetric, π-complementary donor–acceptor–donor triads
Source: publisher site journal article supplement (doi:10.3762/bjoc.9.178), 2013-08-01
Supplement: Additional file 1 [file 1860-5397-9-178-S1.pdf]

**Supporting Information**  
**for**  
**Molecular assembly of amino acid interlinked**  
**topologically symmetric  $\pi$ -complementary donor–**  
**acceptor–donor triads**

M. B. Avinash, K. V. Sandeepa and T. Govindaraju\*

Address: <sup>1</sup>Bioorganic Chemistry Laboratory, New Chemistry Unit, Jawaharlal Nehru  
Centre for Advanced Scientific Research, Jakkur, Bangalore-560064, India. Fax: +91 80  
2208 2627; Tel: +91 80 2208 2969

Email: T. Govindaraju\* - tgraju@jncasr.ac.in

\*Corresponding author

**Experimental details, synthesis procedures, FESEM images, absorption,  
photoluminescence, PXRD and 2D NOESY spectra.**

**Contents**

- 1. Materials and methods (S2)**
- 2. Synthesis procedures (S3–S6)**
- 3. Absorption and photoluminescence spectra (S6–S8)**
- 4. FESEM images (S9–S11)**
- 5. Powder X-ray diffraction study (S12)**
- 6. 2D NOESY (S13–S16)**

## 1. Materials and methods

*Materials:* 1,4,5,8-Naphthalenetetracarboxylic acid dianhydride, 1-pyrenemethylamine hydrochloride and *N,N*-diisopropylethylamine were obtained from Sigma-Aldrich, and 1-hydroxybenzotriazole, L-alanine, L-phenylalanine and L-isoleucine from Spectrochem Pvt. Ltd. (Mumbai, India). All other reagents and solvents were of reagent grade and used without further purification.

*NMR Spectroscopy, Mass Spectrometry (MS), and Elemental Analysis:*  $^1\text{H}$ ,  $^{13}\text{C}$  and 2D NOESY NMR spectra were recorded on a Bruker AV-400 spectrometer with chemical shifts reported as ppm (in DMSO- $d_6$  with tetramethylsilane as internal standard). Mass spectra were obtained from a Shimadzu 2020 LC-MS. Elemental analysis was carried out on a ThermoScientific FLASH 2000 Organic Element Analyzer.

*Absorption Spectroscopy:* UV-vis spectra were recorded on a Perkin Elmer Model Lambda 900 spectrophotometer. 200  $\mu\text{M}$  solutions of the samples were analyzed in quartz cuvettes of 1 mm path length.

*Fluorescence Spectroscopy:* Fluorescence spectra were recorded on a Perkin Elmer Model LS 55 spectrophotometer. 200  $\mu\text{M}$  solutions of the samples were analyzed in a quartz cuvettes of 1 mm path length with an excitation at 345 nm.

*Circular Dichroism (CD):* CD measurements were carried out on a Jasco J-815 spectropolarimeter under nitrogen atmosphere. 400  $\mu\text{M}$  solutions of the samples were analyzed in quartz cuvettes of 1 mm path length.

*Field Emission Scanning Electron Microscopy:* FESEM images were acquired with a FEI Nova nanoSEM-600 equipped with a field-emission gun operating at 15 kV. The samples were prepared by drop-casting free floating aggregates onto a Si (111) substrate.

*Powder X-ray Diffraction (PXRD):* PXRD patterns were recorded with a Rigaku-99 (Miniflex) diffractometer using Cu K $\alpha$  radiation ( $\lambda = 1.5406 \text{ \AA}$ ). The free-floating self-assembled aggregates formed at 40% aqueous DMSO or 40% aqueous NMP were drop casted on a glass slide. The diffraction peaks were indexed by DICVOL program.

*Computational Details:* Energy minimized structures of **1** and **2** were obtained using the software Gaussian-09. The optimization was carried out by the Hartree–Fock method and 3-21G basis set. The optimized geometries were visualized using Visual Molecular Dynamics (VMD).

## 2. Synthesis procedures

### Synthesis of **1**

*Synthesis of alanine appended NDI (Ala-NDI-Ala):* 1,4,5,8-naphthalenetetracarboxylic acid dianhydride (100 mg, 0.373 mmol) and L-alanine (66.46 mg, 0.746 mmol) taken in 20 mL of *N,N*-dimethylformamide were sonicated for 5 min. The resulting suspension was heated for 13 h at 110 °C and then the solvent was concentrated to 5 mL under reduced pressure. The residue was purified by precipitation and washing with diethyl ether to afford a yellow solid in quantitative yield.

Compound Ala-NDI-Ala (100 mg, 0.244 mmol), 1-ethyl-3-(3-dimethylaminopropyl)carbodiimide (102.8 mg, 0.54 mmol) and hydroxybenzotriazole (72.96 mg, 0.54 mmol) were dissolved in *N,N*-dimethylformamide (10 mL) and stirred in an ice bath for about 15 min under inert atmosphere. 1-Pyrenemethylamine hydrochloride (131 mg, 0.5 mmol) and diisopropylethyl amine (0.3 mL) were added to the reaction mixture. The resulting solution was stirred at room temperature for 24 h and the red

coloured precipitate was filtered and washed with excess methanol to afford the red solid, **1** in 63% yield.  $^1\text{H}$  NMR (400 MHz,  $\text{DMSO-}d_6$ ,  $\delta$  in ppm): 8.63(m, 6H), 8.12(m, 18H), 5.59(q, 2H), 4.99(t, 4H), 1.63(d, 6H).  $^{13}\text{C}$  NMR (100 MHz,  $\text{DMSO-}d_6$ ,  $\delta$  in ppm): 168.91, 162.45, 132.58, 130.69, 130.22, 129.93, 127.96, 127.42, 127.30, 126.88, 126.58, 126.47, 126.19, 125.12, 125.07, 124.49, 123.84, 123.78, 123.11, 49.90, 41.00, 14.35. EIMS:  $m/z$  = 836.31  $[\text{M}]^+$  for  $\text{C}_{54}\text{H}_{36}\text{N}_4\text{O}_6$ . Elemental analysis: Found: C, 77.47; H, 4.40; N, 6.62; calcd: C, 77.50; H, 4.34; N, 6.69 for  $\text{C}_{54}\text{H}_{36}\text{N}_4\text{O}_6$ .

## Synthesis of **2**

*Synthesis of phenylalanine appended NDI* (Phe-NDI-Phe): 1,4,5,8-naphthalenetetracarboxylic acid dianhydride (100 mg, 0.373 mmol) and L-phenylalanine (124 mg, 0.746 mmol) taken in 20 mL of *N,N*-dimethylformamide was sonicated for 5 min. The resulting suspension was heated for 16 h at 110 °C and then the solvent was concentrated to 5 mL under reduced pressure. The residue was purified by precipitation and washing with diethyl ether to afford a brown solid in quantitative yield.

Compound Phe-NDI-Phe (70 mg, 0.124 mmol), 1-ethyl-3-(3-dimethylaminopropyl)carbodiimide (52.52 mg, 0.274 mmol), hydroxybenzotriazole (37 mg, 0.274 mmol) was dissolved in *N,N*-dimethylformamide (10 mL) and stirred in an ice bath for about 15 min under inert atmosphere. 1-Pyrenemethylamine hydrochloride (67 mg, 0.248 mmol) and diisopropylethyl amine (0.5 mL) were added to the reaction mixture. The resulting solution was stirred at room temperature for 24 h and the red coloured precipitate was filtered and washed with excess methanol to afford the red solid, **2** in 52% yield.  $^1\text{H}$  NMR (400 MHz,  $\text{DMSO-}d_6$ ,  $\delta$  in ppm): 8.72(t, 2H), 8.53(s, 4H),

8.13(m, 18H), 5.86(q, 2H), 5.02(m, 4H), 3.73(dd, 2H), 3.38(dd, 2H).  $^{13}\text{C}$  NMR (100 MHz, DMSO- $d_6$ ,  $\delta$  in ppm): 168.12, 162.39, 137.97, 132.49, 130.72, 130.37, 130.22, 129.96, 128.91, 127.97, 127.92, 127.45, 127.32, 126.91, 126.17, 125.84, 125.15, 125.07, 124.53, 123.88, 123.80, 123.06, 55.43, 40.91, 33.83. EIMS:  $m/z = 988.48$   $[\text{M}]^+$  for  $\text{C}_{66}\text{H}_{44}\text{N}_4\text{O}_6$ . Elemental analysis: Found: C, 80.21; H, 4.54; N, 5.61; calcd: C, 80.15; H, 4.48; N, 5.66 for  $\text{C}_{66}\text{H}_{44}\text{N}_4\text{O}_6$ .

### Synthesis of **3**

*Synthesis of isoleucine appended NDI* (Ile-NDI-Ile): 1,4,5,8-naphthalenetetracarboxylic acid dianhydride (100 mg, 0.373 mmol) and L-isoleucine (98 mg, 0.746 mmol) taken in 20 mL of *N,N*-dimethylformamide were sonicated for 5 min. The resulting suspension was heated for 24 h at 110 °C and then the solvent was concentrated to 5 mL under reduced pressure. The residue was purified by precipitation and washing with diethyl ether to afford a brown solid in quantitative yield.

Compound Ile-NDI-Ile (400 mg, 0.809 mmol), 1-ethyl-3-(3-dimethylaminopropyl)carbodiimide (342 mg, 1.781 mmol) and hydroxybenzotriazole (241 mg, 1.781 mmol) were dissolved in *N,N*-dimethylformamide (15 mL) and stirred in an ice bath for about 15 min under an inert atmosphere. 1-Pyrenemethylamine hydrochloride (437 mg, 1.618 mmol) and diisopropylethyl amine (0.5 mL) were added to the reaction mixture. The resulting solution was stirred at room temperature for 24 h and the red coloured precipitate was filtered and washed with an excess of methanol to afford the red solid, **3** in 55% yield.  $^1\text{H}$  NMR(400 MHz, DMSO- $d_6$ ,  $\delta$  in ppm): 8.62(m, 6H), 8.13(m, 18H), 5.18(d, 2H), 4.96(m, 4H), 2.60(m, 2H), 1.19(m,

8H), 0.85(m, 2H), 0.73(t, 6H).  $^{13}\text{C}$  NMR(100 MHz.  $\text{DMSO-}d_6$ ,  $\delta$  in ppm): 167.96, 162.74, 132.63, 130.73, 130.66, 130.17, 129.90, 127.97, 127.32, 126.84, 126.56, 126.19, 126.12, 125.07, 124.99, 124.40, 123.84, 123.76, 123.07, 58.65, 40.87, 32.66, 24.46, 18.59, 11.09. EIMS:  $m/z = 920.45$   $[\text{M}]^+$  for  $\text{C}_{60}\text{H}_{48}\text{N}_4\text{O}_6$ . Elemental analysis: Found: C, 78.31; H, 5.34; N, 6.11; calcd: C, 78.24; H, 5.25; N, 6.08 for  $\text{C}_{60}\text{H}_{48}\text{N}_4\text{O}_6$ .

### 3. Absorption and photoluminescence spectra

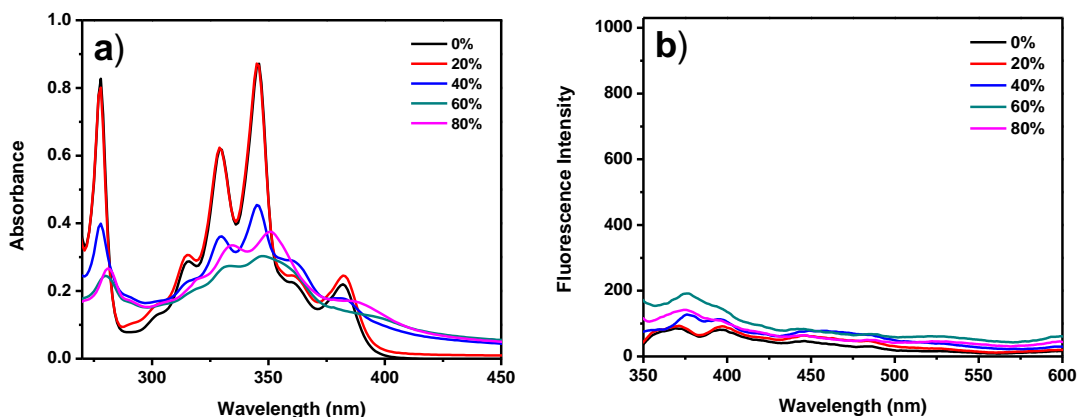

**Figure S1:** (a) UV-vis and (b) fluorescence spectra of 200  $\mu\text{M}$  of **1** in aqueous NMP. Excitation at 345 nm. The values represent the various percentages of water in aqueous NMP.

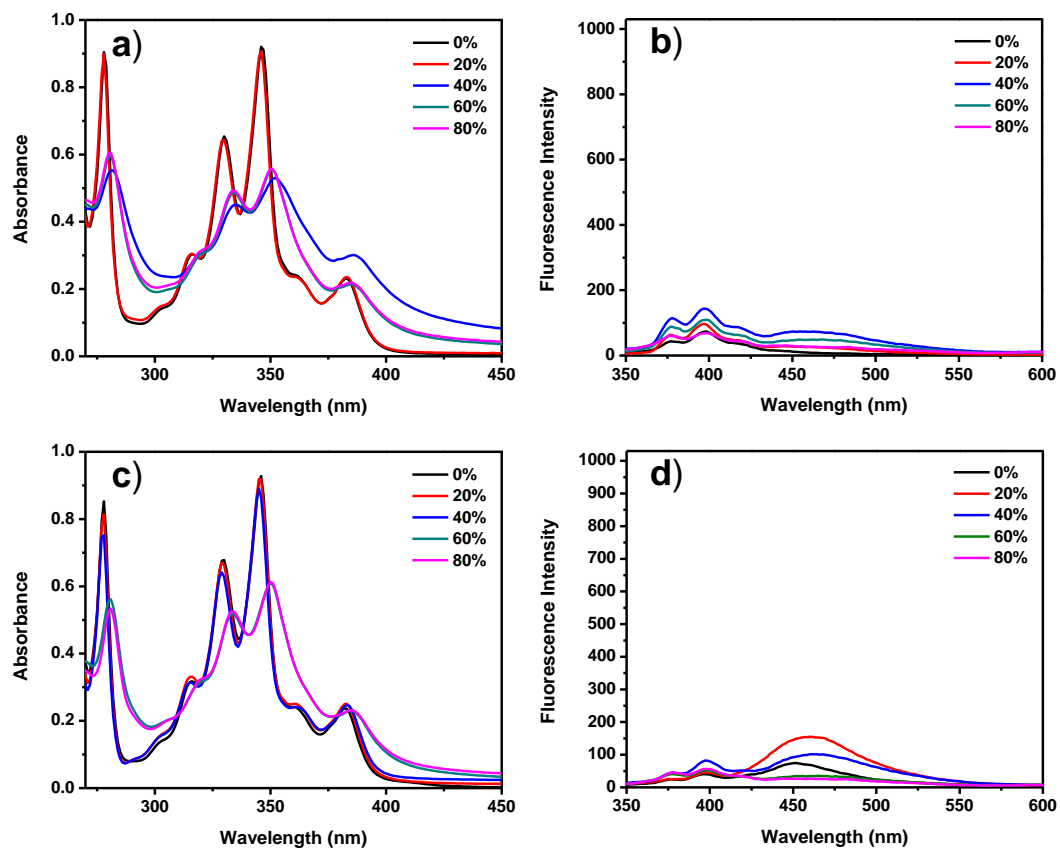

**Figure S2:** (a) and (c) UV-vis, (b) and (d) fluorescence spectra of 200  $\mu\text{M}$  of **2**. (a) and (b) are in aqueous DMSO, (c) and (d) are in aqueous NMP. Excitation at 345 nm. The values represent the various percentages of water in aqueous NMP.

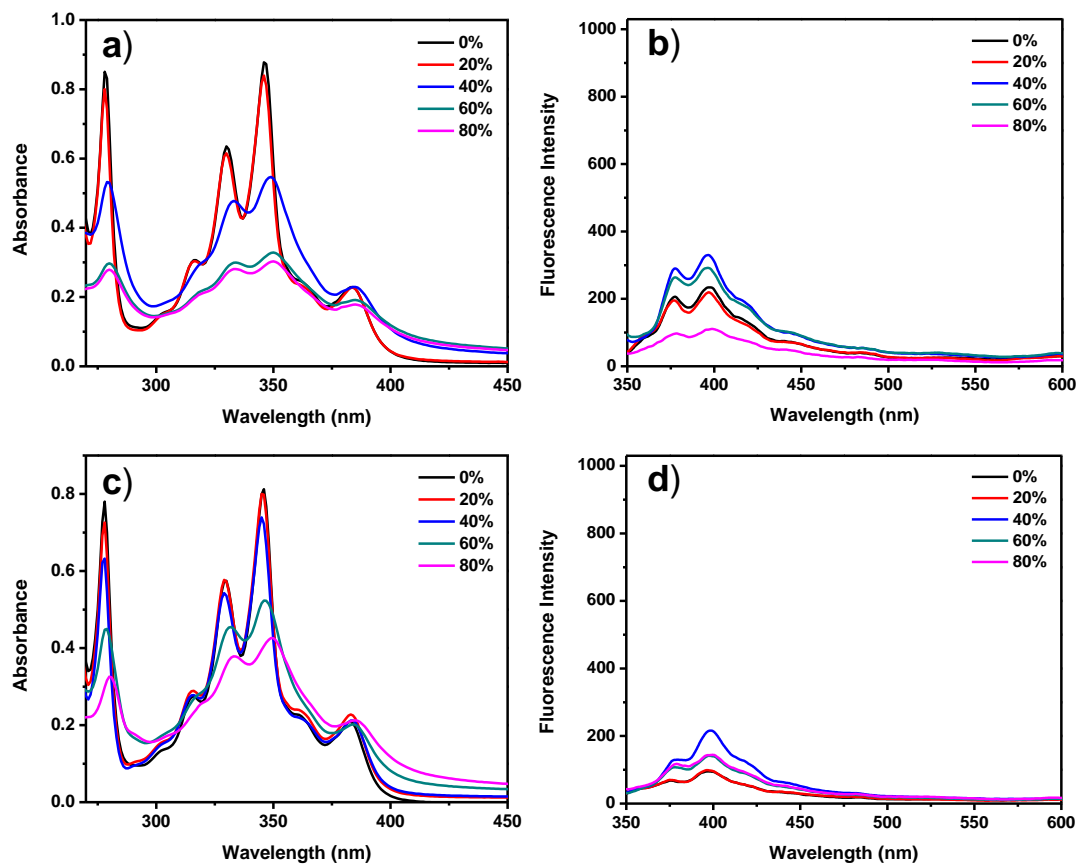

**Figure S3:** (a) and (c) UV-vis, (b) and (d) fluorescence spectra of 200  $\mu\text{M}$  of **3**. (a) and (b) are in aqueous DMSO, (c) and (d) are in aqueous NMP. Excitation at 345 nm. The values represent the various percentages of water in aqueous NMP.



#### 4. FESEM images

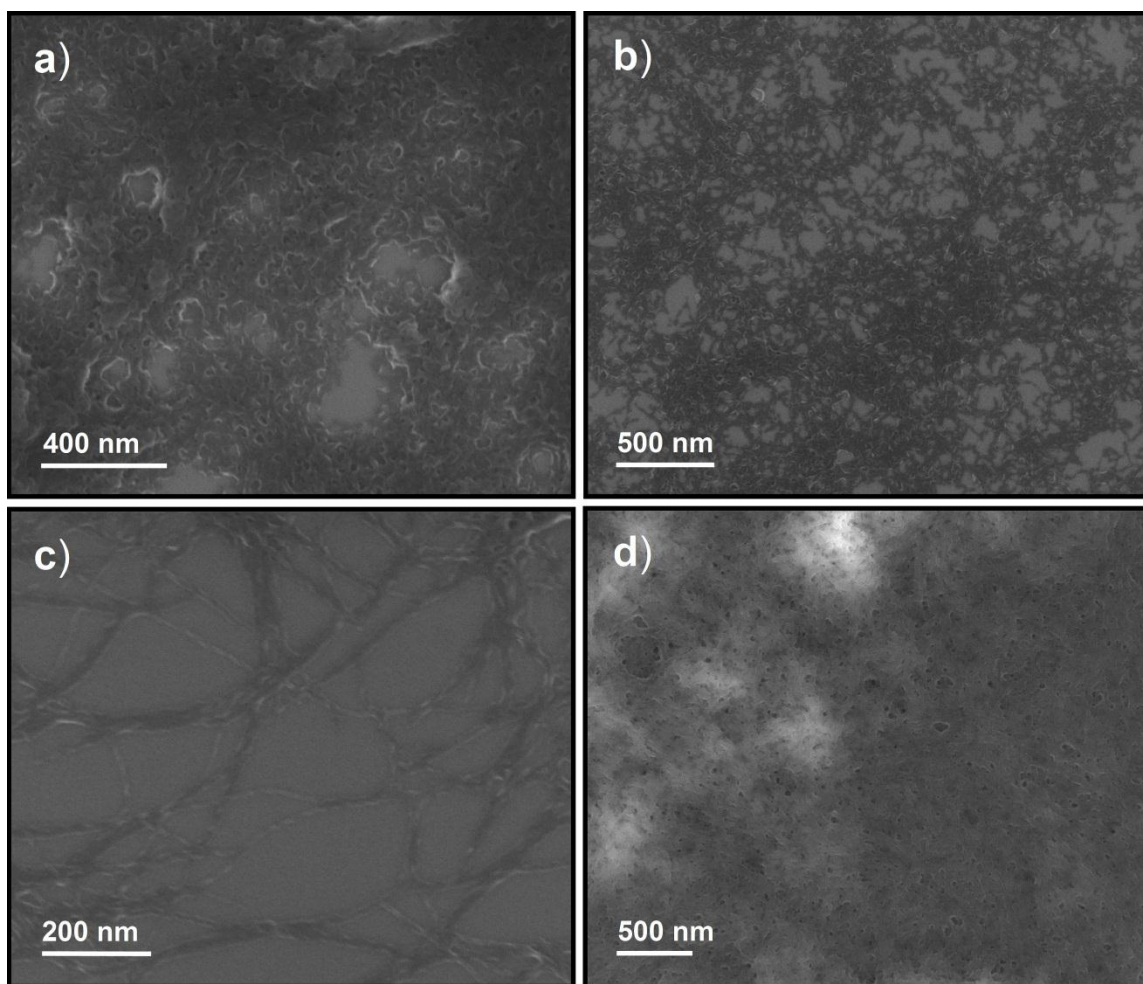

**Figure S4:** FESEM image of **1** obtained from (a) 40% and (b) 80% aqueous DMSO. FESEM image of **1** obtained from (c) 40% and (d) 80% aqueous NMP.

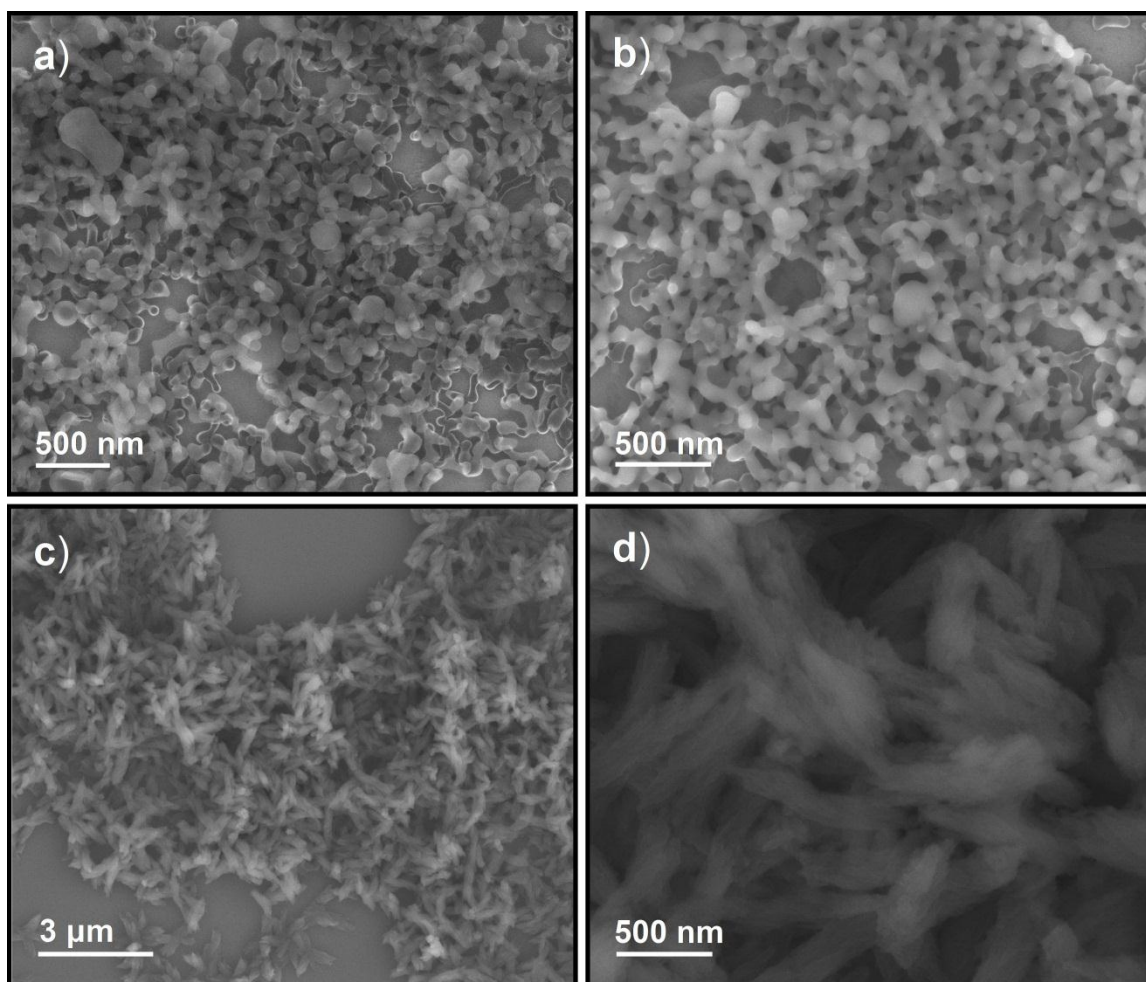

**Figure S5:** FESEM image of **2** obtained from (a) 40% and (b) 80% aqueous DMSO. (c) and (d) FESEM image of **2** obtained from 80% aqueous NMP.

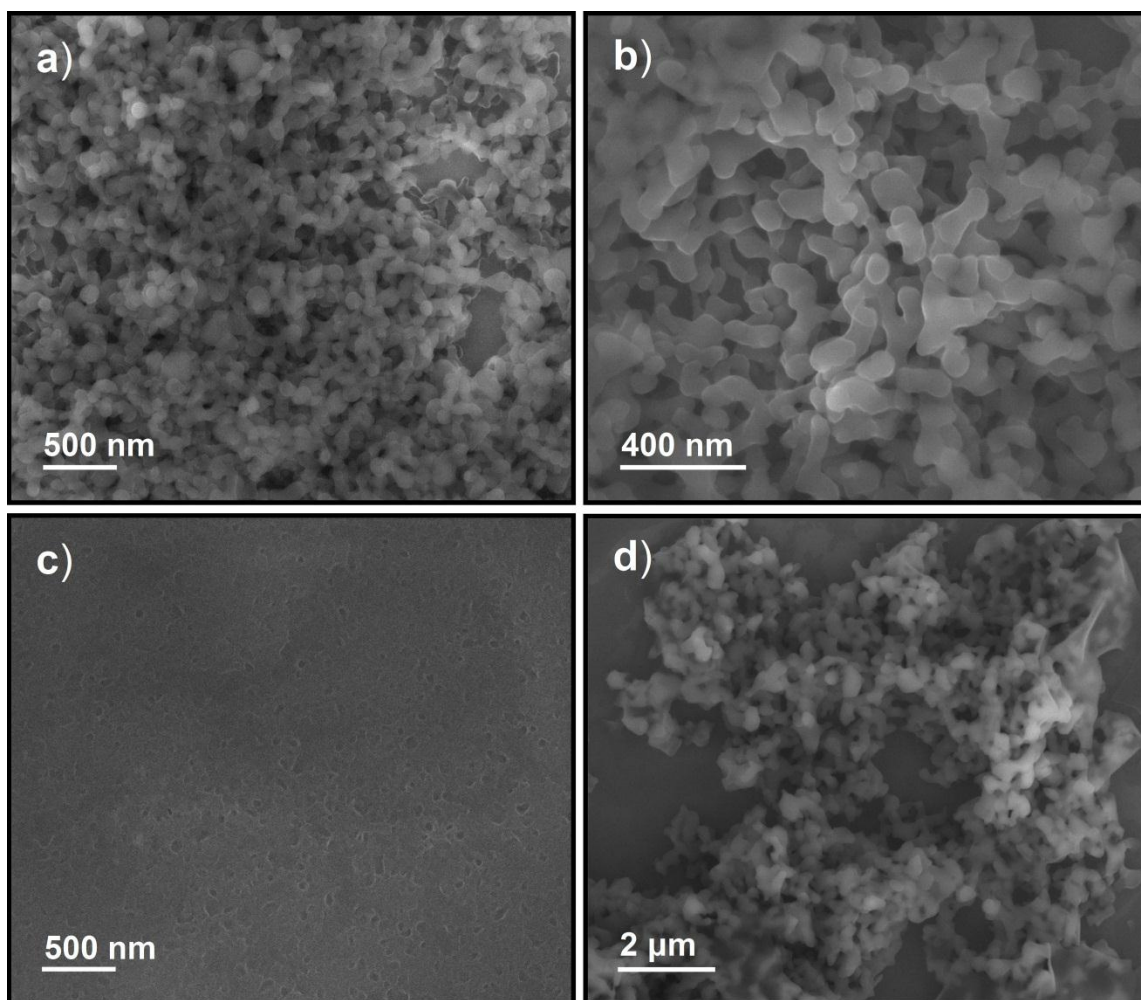

**Figure S6:** FESEM image of **3** obtained from (a) 40% and (b) 80% aqueous DMSO. FESEM image of **3** obtained from (c) 40% and (d) 80% aqueous NMP.

## 5. Powder X-ray diffraction study

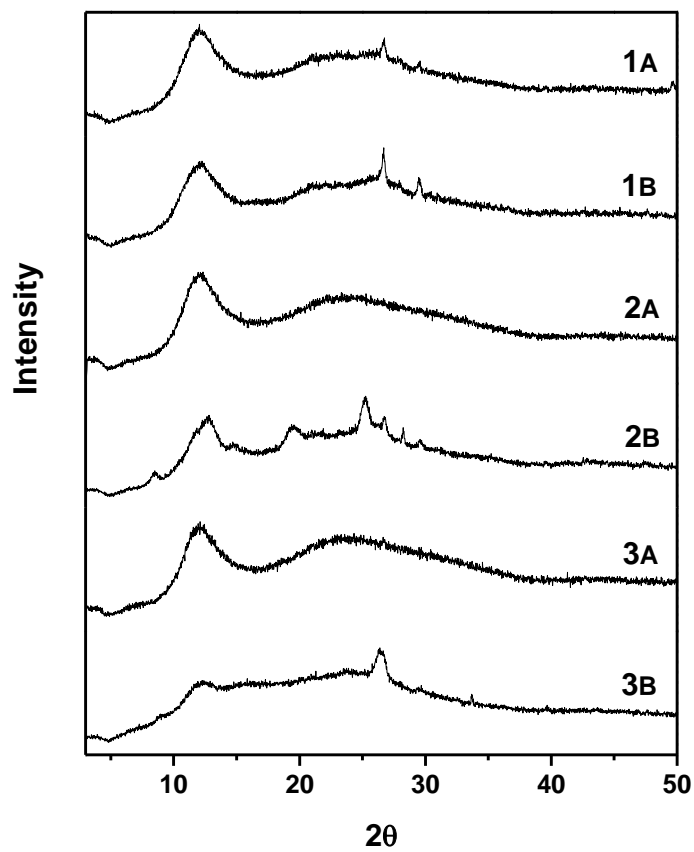

**Figure S7:** PXRD of **1**, **2** and **3** obtained from 40% aqueous DMSO (A) and 40% aqueous NMP (B) respectively.

## 6. 2D NOESY

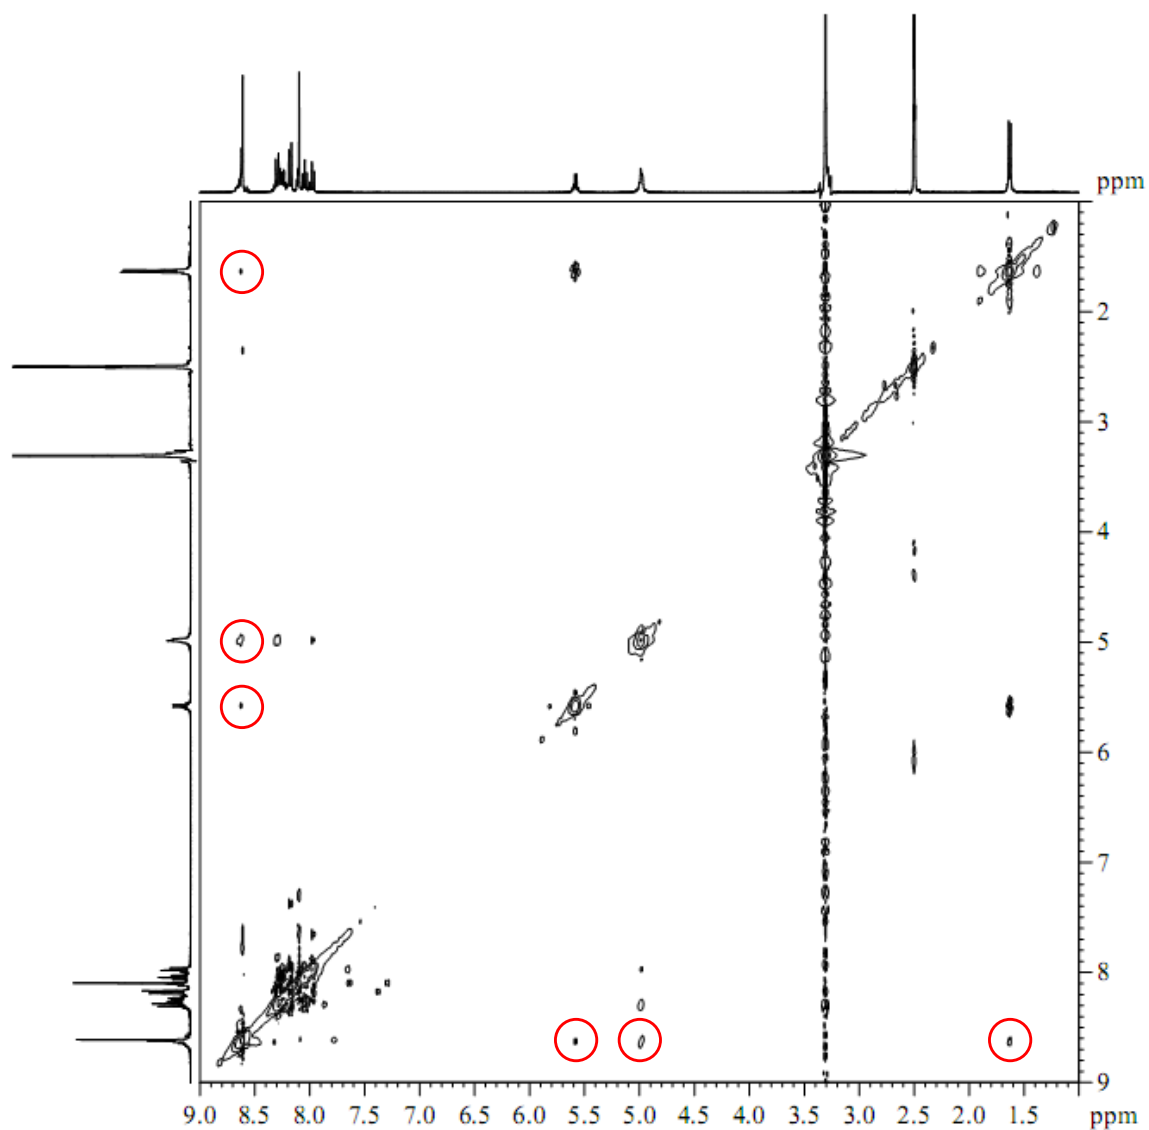

**Figure S8:** 2D NOESY NMR spectra of **1**. Red circles indicate the cross peaks of amide NH proton with the proton of  $\alpha$ -carbon and  $\text{CH}_3$  protons of alanine as well as with the  $\text{CH}_2$  protons of pyrenemethylamine.

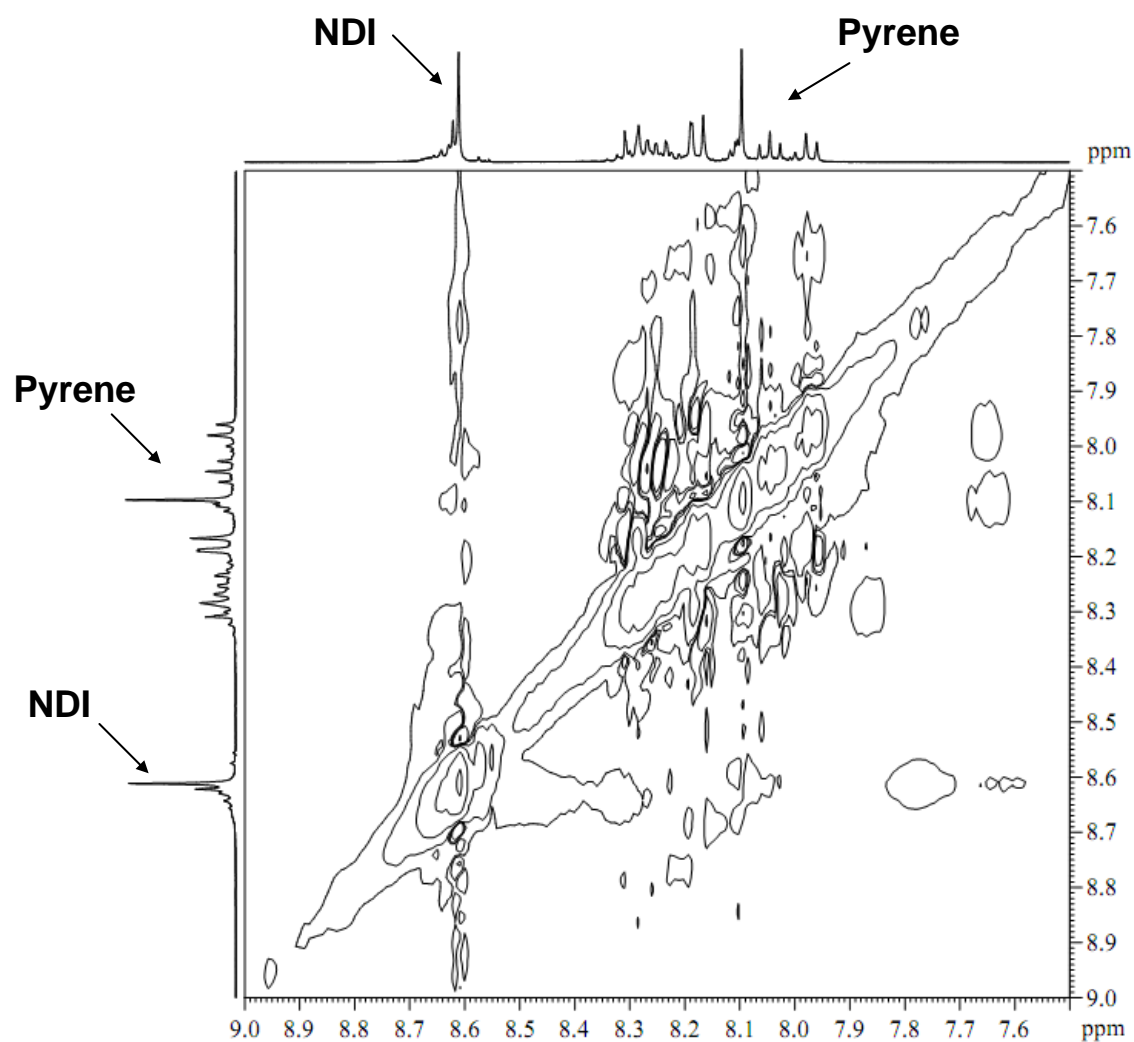

**Figure S9:** 2D NOESY NMR spectra of **1** shows a weak spatial aromatic interaction of NDI and pyrene in DMSO-*d*<sub>6</sub>.

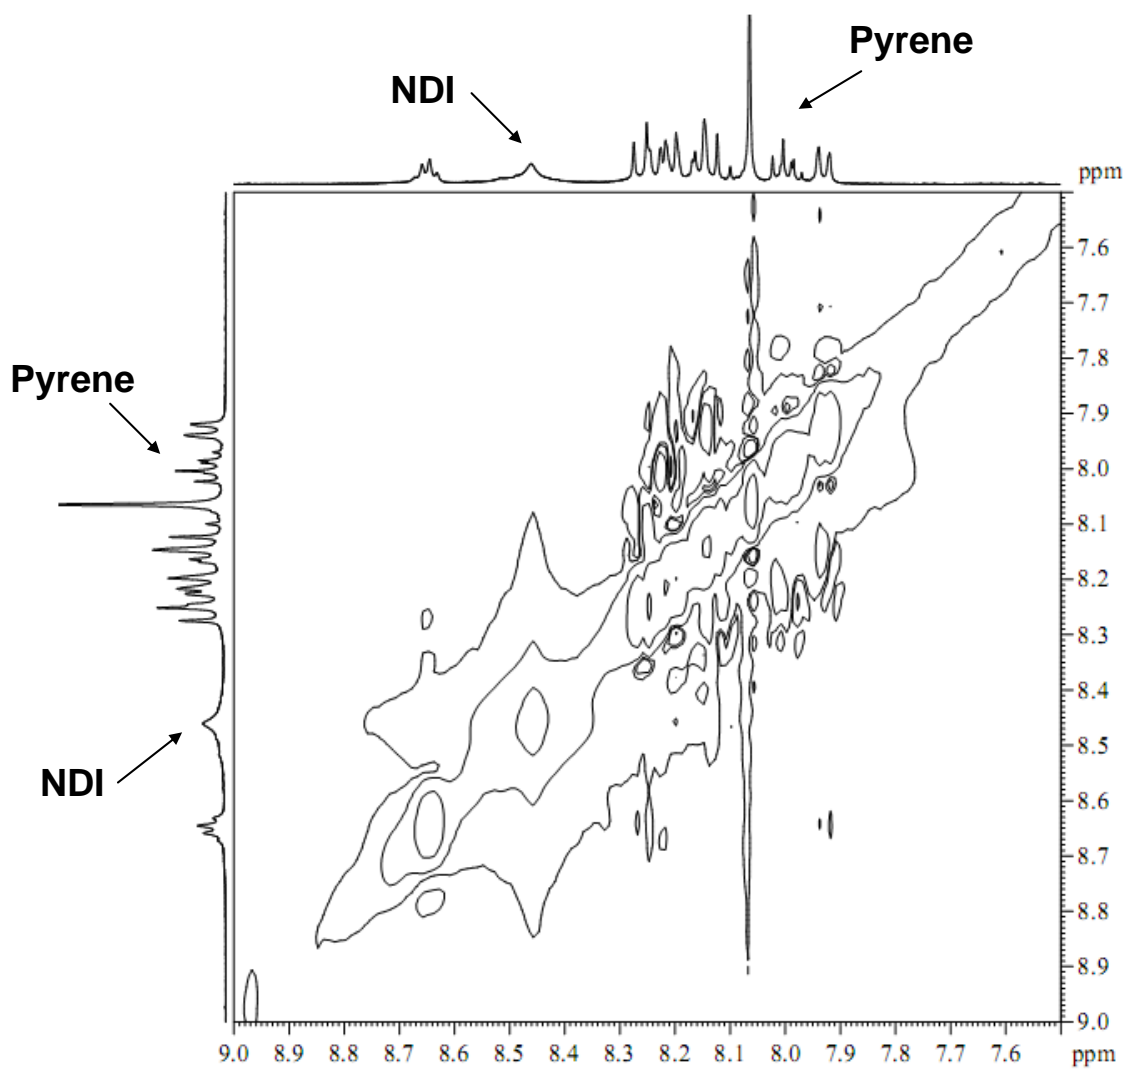

**Figure S10:** 2D NOESY NMR spectra of **2** shows a weak spatial aromatic interaction of NDI and pyrene in DMSO-*d*<sub>6</sub>.



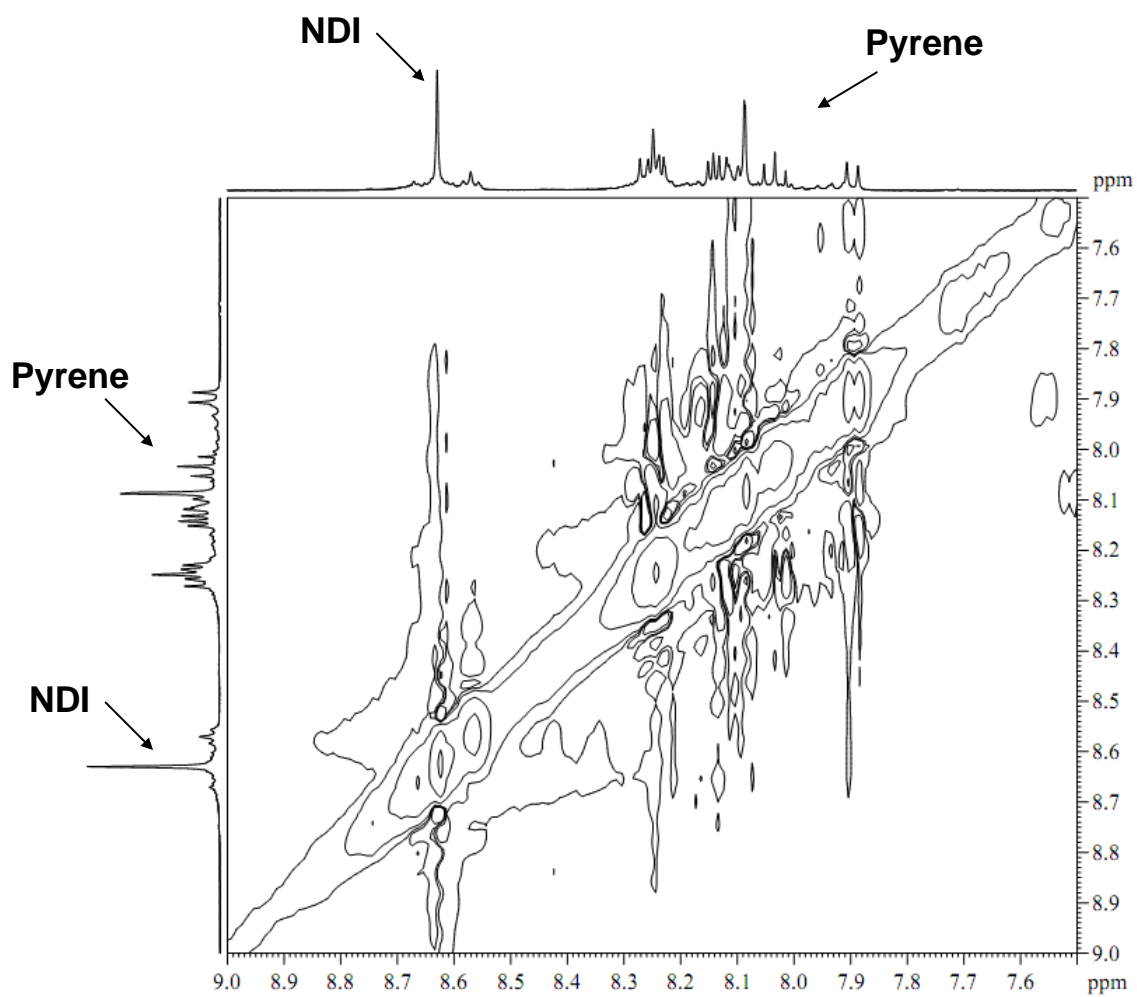

**Figure S11:** 2D NOESY NMR spectra of **3** shows a weak spatial aromatic interaction of NDI and pyrene in DMSO-*d*<sub>6</sub>.
